# Supplementary material
Source: ML conference proceedings conference paper supplement (https://openaccess.thecvf.com/content/CVPR2026/html/Li_Towards_Real-World_Document_CVPR_2026_paper.html)
Supplement: Supplementary file 1 [file Li_Towards_Real-World_Document_CVPR_2026_supplemental.pdf]

# Towards Real-World Document Parsing via Realistic Scene Synthesis and Document-Aware Training

## Supplementary Material

### 1. Data Source

#### 1.1. Document Element Sources

To construct a comprehensive element library for document parsing, we consolidate and utilize a variety of publicly available datasets across formulas, tables, and paragraphs. The detailed data sources are summarized in Table 1.

To enrich the diversity and generalization ability of our dataset, we conduct systematic data augmentation using the Qwen2.5-72B large language model (LLM). An overview of the augmentation pipeline is illustrated in Fig. 1. The augmentation procedures are tailored to the unique structure of each document element type and are described as follows:

**Table Template Augmentation** We perform table augmentation by modifying both content and layout structure:

- **Content Modification:** Table cell content is replaced with mathematical formulas or multilingual text corpora to increase linguistic and semantic diversity.
- **Structural Transformation:** Cells are randomly merged, split, or duplicated to generate novel table templates.

After augmentation, we apply rule-based post-processing to remove structurally invalid or semantically inconsistent tables. Final table-image and text-pair samples are synthesized using table rendering tools.

**Formula Template Augmentation** We augment LaTeX-formatted formulas by manipulating token sequences:

- **Symbol and Lexical Variation:** Symbols and word stems within formulas are systematically altered to increase symbolic diversity.
- **Structural Variation:** The spatial and logical composition of sub-formulas is reorganized to create new formula structures.

Invalid LaTeX expressions (e.g., non-compileable or syntactically incorrect) are filtered out. Valid formulas are rendered into isolated images using LaTeX rendering engines.

**Paragraph-Level Data Augmentation** We generate paragraph-level data with embedded formulas through two approaches:

- **Formula-Text Fusion:** Generated LaTeX formulas are inserted into natural language paragraphs, which are then rendered to create image-text pairs that simulate real-world academic content.

- **Semantic Paragraph Synthesis:** The LLM is used to generate semantically coherent multi-paragraph text blocks, which are rendered as full-page document images. The corresponding text corpus is preserved for further alignment and downstream synthesis tasks.
- **Multilingual Data Augmentation:** To enhance cross-lingual document understanding, we employ LLM-based translation to convert corpora into multiple languages, thereby enriching the dataset with a diverse set of multilingual samples.

This hierarchical augmentation pipeline ensures a high degree of variability and realism across multiple document modalities, forming a robust foundation for document analysis and understanding. In total, we consolidate both the original and augmented data, resulting in a unified corpus comprising 3.1 million table instances, 3.3 million formula samples, and 3 million paragraph-level documents.

#### 1.2. Layout Sources

Our layout templates are primarily derived from three sources to ensure both structural diversity and annotation consistency.

**1) Public Benchmarks** We curate a set of publicly available layout datasets[7, 17, 27] that provide reading order annotations. These datasets serve as the foundation of our layout template library. To address inconsistencies in annotation schemas, we normalize all category labels to a unified taxonomy, reducing ambiguity across datasets. For each document, we extract structured layout information, including the original image dimensions and the bounding box coordinates of each layout element. These data points are recorded as digital layout templates.

**2) High-Confidence Model Inference** To further enrich our layout template diversity, we apply a pre-trained layout analysis model to a set of structured documents. Inference results with high confidence scores and minimal inter-region overlap are retained. This filtering ensures the structural integrity of the layout while augmenting the dataset with additional real-world layout variations.

**3) Composite Layout Construction** To simulate dense layout scenarios found in newspapers and book pages, we further construct composite templates by concatenating multiple single-page layouts into unified multi-section

Table 1. Document element datasets and corresponding formats.

| Element Type      | Datasets                                                           | Format |
|-------------------|--------------------------------------------------------------------|--------|
| Table Parsing     | FinTabNet [20], PubTabNet [30], TalTabNet [5]                      | HTML   |
| Formula Parsing   | UniMER [21], CROHME14 [12], CROHME16 [13], CROHME19 [10], HME [26] | LaTeX  |
| Paragraph Parsing | FOX [9], GOT [24]                                                  | Text   |

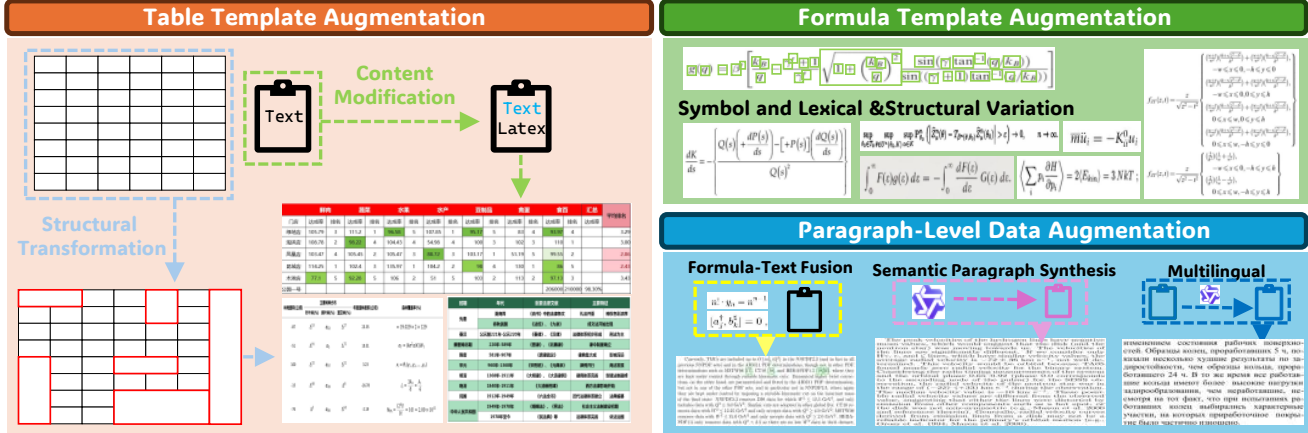

Figure 1. **Element-Aware Augmentation Pipeline.** Qwen2.5-72B drives content- and structure-level edits for tables, formulas, and paragraphs, followed by rule-based validation and LaTeX rendering to produce image–annotation pairs.

documents. To preserve rendering quality and visual coherence, we constrain the number of merged layout modules to a maximum of 50 per composite document.

By combining curated benchmarks with reliable model-generated samples, we construct a robust and diverse layout template corpus for downstream layout-aware tasks.

## 2. Supplementary Experiments

### 2.1. Sub-element Parsing Evaluation

To evaluate DocHumming’s effectiveness on fine-grained document understanding tasks, we conduct a series of benchmarking experiments on sub-element parsing. Our model is compared against both specialized open-source methods and widely used commercial APIs across multiple public datasets.

#### 2.1.1. Mathematical Formula Recognition.

**Handwritten setting.** We first evaluate handwritten formula recognition on **HME100K** [26] and **CROHME** [10, 12, 13], reporting *Expression Recognition Rate* (ExpRate) and *Character Deletion Metric* (CDM) [22]; results are summarized in Table 2. We also assess cross-domain robustness on **UniMER** [21], with results in Table 3. *DocHumming* improves HME ExpRate by **8.72%** and surpasses state-of-the-art methods across CROHME editions, while maintaining strong generalization on UniMER (printed/handwritten, syntactic/semantic variants), which

we attribute to instruction-tuned pretraining and structure-aware optimization.

**Digital/scanned setting.** To measure formula parsing on typeset documents, we further evaluate the *Formula-Block* subset of **OmniDocBench** (scanned/digital) [15]. Results in Table 4 (CDM $\uparrow$ ) show that *DocHumming* reaches a CDM of **0.9741**, outperforming strong modular and end-to-end baselines; it yields a **+2.88** point absolute gain over the best prior system. These results indicate that our unified training recipe and realistic synthesis not only benefit handwritten formulas but also deliver state-of-the-art accuracy on clean typeset pages.

Table 2. Performance comparison on **CROHME** and **HME** datasets for mathematical formula recognition.

| Dataset               | Method            | ExpRate      | $\leq 1$     | $\leq 2$     | $\leq 3$     |
|-----------------------|-------------------|--------------|--------------|--------------|--------------|
| <b>CROHME 14</b> [12] | PosFormer [4]     | 62.74        | 78.47        | 84.16        | 88.32        |
|                       | <b>DocHumming</b> | <b>70.48</b> | <b>81.54</b> | <b>86.91</b> | <b>90.16</b> |
| <b>CROHME 16</b> [13] | PosFormer         | 61.02        | 77.07        | 83.60        | 88.14        |
|                       | <b>DocHumming</b> | <b>67.56</b> | <b>82.04</b> | <b>89.27</b> | <b>92.15</b> |
| <b>CROHME 19</b> [10] | PosFormer         | 64.97        | 81.23        | 85.48        | 88.15        |
|                       | <b>DocHumming</b> | <b>68.39</b> | <b>82.98</b> | <b>88.24</b> | <b>91.24</b> |
| <b>HME</b> [26]       | PosFormer         | 69.06        | 84.58        | 89.94        | 92.45        |
|                       | <b>DocHumming</b> | <b>77.78</b> | <b>89.77</b> | <b>93.49</b> | <b>95.15</b> |

Table 3. Performance comparison on the **UniMER** benchmark for mathematical formula recognition.

| Method            | SPE            | CPE            | HWE            | SCE            |
|-------------------|----------------|----------------|----------------|----------------|
|                   | CDM $\uparrow$ | CDM $\uparrow$ | CDM $\uparrow$ | CDM $\uparrow$ |
| Pix2tex [2]       | 96.19          | 64.89          | 24.53          | 67.62          |
| Texify [16]       | 98.52          | 70.41          | 52.69          | 79.32          |
| Mathpix [11]      | 97.29          | <b>96.71</b>   | 93.18          | <u>92.38</u>   |
| UniMERNet [21]    | <b>99.14</b>   | 95.95          | <u>94.00</u>   | 93.73          |
| <b>DocHumming</b> | <u>98.91</u>   | <u>96.61</u>   | <b>96.85</b>   | <b>94.91</b>   |

Table 4. Results on **OmniDocBench-Formula-Block** (CDM $\uparrow$ ). Best in **bold**, second best underlined.

| Method                   | CDM $\uparrow$ |
|--------------------------|----------------|
| dots.ocr [18]            | 0.4641         |
| MinerU2-VLM [23]         | 0.8286         |
| MonkeyOCR-pro-1.2B [8]   | 0.8531         |
| MonkeyOCR-3B [8]         | 0.8621         |
| Qwen2.5-VL-72B [1]       | 0.8747         |
| MinerU2.5 [14]           | 0.9187         |
| PaddleOCR-VL [3]         | <u>0.9453</u>  |
| <b>DocHumming (Ours)</b> | <b>0.9741</b>  |

### 2.1.2. End-to-End Table Parsing

We evaluate end-to-end table parsing on FinTabNet [28] and PubTabNet [29], employing TEDS and TEDS-S as structural and semantic evaluation metrics, and the experimental results are presented in Table 5.

Our model achieves superior performance in table parsing tasks, outperforming OmniParser V2 [25] by **5.4%** on FinTabNet and **6.5%** on PubTabNet in Structure-TEDS. When incorporating text into evaluation, DocHumming exhibits even greater improvements, outperforming OmniParser V2 by **7.6%** on FinTabNet and **7.1%** on PubTabNet.

Table 5. Performance comparison on FinTabNet and PubTabNet benchmarks for end-to-end table parsing.

| Method             | FinTabNet         |                 | PubTabNet         |                 |
|--------------------|-------------------|-----------------|-------------------|-----------------|
|                    | S-TEDS $\uparrow$ | TEDS $\uparrow$ | S-TEDS $\uparrow$ | TEDS $\uparrow$ |
| Donut [6]          | 30.6              | 29.1            | 25.2              | 22.7            |
| EDD [31]           | 90.6              | –               | 89.9              | 88.3            |
| OmniParser V2 [25] | <u>93.2</u>       | <u>90.5</u>     | <u>90.5</u>       | <u>88.9</u>     |
| <b>DocHumming</b>  | <b>98.6</b>       | <b>98.1</b>     | <b>97.0</b>       | <b>96.0</b>     |

**OmniDocBench-Table-block.** We further test cropped-table parsing on **OmniDocBench-Table-block**. *DocHumming* attains **0.9421 TEDS** and **0.9693 Structural TEDS**, outperforming strong modular and E2E baselines. *DocHumming* improves over the best baseline

Table 6. Results on OmniDocBench-Table-block (cropped tables).

| Method            | Overall TEDS $\uparrow$ | Structural TEDS $\uparrow$ |
|-------------------|-------------------------|----------------------------|
| MinerU2-VLM [23]  | 0.9002                  | 0.9369                     |
| Seed1.6 [19]      | 0.9079                  | 0.9489                     |
| dots.ocr [18]     | 0.8194                  | 0.8442                     |
| MinerU2.5 [14]    | 0.9005                  | 0.9539                     |
| PaddleOCR-VL [3]  | 0.9195                  | 0.9543                     |
| <b>DocHumming</b> | <b>0.9421</b>           | <b>0.9693</b>              |

(PaddleOCR-VL) by **+2.26 TEDS** and **+1.50 Structural TEDS**, confirming strong structural fidelity on real printed layouts.

### 2.2. Effect of Structural Loss Weight $\lambda$

To evaluate the impact of structural supervision, we conduct an ablation study on the structural loss weight  $\lambda$ , which balances the contribution of structure-aware loss during training. The results across various  $\lambda$  settings are presented in Table 7, based on the OmniDocBench benchmark.

Table 7. Impact of structural loss weight  $\lambda$  on OmniDocBench performance and redundancy rate.

| #             | OmniDocBench |            |
|---------------|--------------|------------|
|               | Overall      | Repeat (%) |
| $\lambda = 1$ | 88.74        | 4.6        |
| $\lambda = 2$ | 92.81        | 3.4        |
| $\lambda = 4$ | <b>93.75</b> | <b>2.1</b> |
| $\lambda = 6$ | 93.60        | 2.1        |

As shown in Table 7, increasing  $\lambda$  consistently reduces the repeat rate, indicating that structural guidance helps mitigate output redundancy. This improvement is attributed to breaking the uniform treatment of tokens in autoregressive decoding by introducing stronger structure-aware optimization.

However, when  $\lambda$  becomes too large (e.g., 6), we observe a slight degradation in performance despite the stable repeat rate. This suggests an overemphasis on structure-dominated samples during training, which leads to suboptimal balance across other element types and table elements.

Our results suggest that setting  $\lambda = 4$  offers the best trade-off between structured accuracy and generation coherence.

### 3. DocMix Visualization

To help better illustrate the annotation schema and overall data quality of the DocMix dataset, we provide a set of representative samples as part of the supplementary materials. These examples are intended to support a deeper under-

standing of the document parsing rules adopted in DocMix and the variety of content types included in the dataset.

#### 4. Wild-OmniDocBench Visualization

We additionally include a small set of Wild-OmniDocBench examples in the supplementary package. Image filenames are exactly aligned with the original OmniDocBench images, so users can directly cross-reference the official OmniDocBench annotations for label alignment.

#### 5. Test Case Analysis

To further demonstrate the robustness and adaptability of DocHumming in diverse real-world scenarios, we supplement our evaluation with test cases collected from various web-sourced document images. These additional samples cover a wide range of formats and layouts beyond the original training distribution.

We visualize several representative parsing results in Figs. 2 and 3. These examples highlight DocHumming’s ability to handle noisy inputs and uncommon layout structures, reflecting its strong generalization capabilities across domains.

#### 6. Error Case Analysis

We conduct an error analysis on web-scraped document images by running *DocHumming* inference and selecting cases whose outputs (i) hit the maximum output length (8,192 tokens) and (ii) exhibit repetitive decoding. We categorize the failures into four major types (see Fig. 4 for examples):

- **Ultra-high-resolution pages.** Very large pages require downsampling or tiling, which can trigger repeated or missing content in dense regions.
- **Irregular, interleaved layouts.** Non-standard pages (e.g., interwoven/nested blocks in newspapers or posters) blur structural boundaries and reading order.
- **Oversized structured tables.** Long tables with many rows/columns magnify exposure bias and increase repetition near structural delimiters.
- **Extreme aspect ratios.** Very tall or wide images reduce effective resolution for fine details and destabilize long-context decoding.

These observations suggest targeted improvements on both axes: **model**—enhanced layout-aware perception for irregular structures, resolution-adaptive processing for ultra-large pages with cross-tile consistency, and more stable long-context decoding; **data**—augment *Realistic Scene Synthesis* with page-level content that emphasizes semantic consistency and logical coherence across elements, plus dedicated stress tests for extreme sizes and aspect ratios. Representative failure cases and visualizations are provided in Fig. 4.

#### References

- [1] Shuai Bai, Keqin Chen, Xuejing Liu, Jialin Wang, Wenbin Ge, Sibao Song, Kai Dang, Peng Wang, Shijie Wang, Jun Tang, Humen Zhong, Yuanzhi Zhu, Mingkun Yang, Zhaohai Li, Jianqiang Wan, Pengfei Wang, Wei Ding, Zheren Fu, Yiheng Xu, Jiabo Ye, Xi Zhang, Tianbao Xie, Zesen Cheng, Hang Zhang, Zhibo Yang, Haiyang Xu, and Junyang Lin. Qwen2.5-vl technical report. *arXiv preprint arXiv:2502.13923*, 2025. 3
- [2] BreezeDeus. Pix2text: Image-to-latex ocr tool. <https://github.com/breezedeus/Pix2Text>, 2024. Accessed: 2025-07-30. 3
- [3] Cheng Cui, Ting Sun, Suyin Liang, Tingquan Gao, Zelun Zhang, Jiaxuan Liu, Xueqing Wang, Changda Zhou, Hongen Liu, Manhui Lin, et al. Paddleocr-vl: Boosting multilingual document parsing via a 0.9 b ultra-compact vision-language model. *arXiv preprint arXiv:2510.14528*, 2025. 3
- [4] Tongkun Guan, Chengyu Lin, Wei Shen, and Xiaokang Yang. Posformer: Recognizing complex handwritten mathematical expression with position forest transformer. *arXiv preprint arXiv:2407.07764*, 2024. 2
- [5] Heywhale. taltab. <https://www.heywhale.com/home/competition/606d6fff0e04ac0017c3bf7f/content/1>, 2021. Accessed: 2025-08-02. 2
- [6] Geewook Kim, Teakgyu Hong, Moonbin Yim, JeongYeon Nam, Jinyoung Park, Jinyeong Yim, Wonseok Hwang, Sangdoon Yun, Dongyoon Han, and Seunghyun Park. Ocr-free document understanding transformer. In *European Conference on Computer Vision (ECCV)*, 2022. 3
- [7] Lihang Li. CdlA: A comprehensive dataset for layout-aware document understanding. <https://github.com/buptlihang/CDLA>, 2024. Accessed: 2025-07-28. 1
- [8] Zhang Li, Yuliang Liu, Qiang Liu, Zhiyin Ma, Ziyang Zhang, Shuo Zhang, Zidun Guo, Jiarui Zhang, Xinyu Wang, and Xiang Bai. Monkeyocr: Document parsing with a structure-recognition-relation triplet paradigm. *arXiv preprint arXiv:2506.05218*, 2025. 3
- [9] Chenglong Liu, Haoran Wei, Jinyue Chen, Lingyu Kong, Zheng Ge, Zining Zhu, Liang Zhao, Jianjian Sun, Chunrui Han, and Xiangyu Zhang. Focus anywhere for fine-grained multi-page document understanding. *arXiv preprint arXiv:2405.14295*, 2024. 2
- [10] Mahshad Mahdavi, Richard Zanibbi, Harold Mouchere, Christian Viard-Gaudin, and Utpal Garain. Icdar 2019 crohme+ tfd: Competition on recognition of handwritten mathematical expressions and typeset formula detection. In *2019 International Conference on Document Analysis and Recognition (ICDAR)*, pages 1533–1538. IEEE, 2019. 2
- [11] Mathpix. Mathpix Snip: Convert images and PDFs to LaTeX, DOCX, and more. <https://mathpix.com/>, 2025. 3
- [12] Harold Mouchere, Christian Viard-Gaudin, Richard Zanibbi, and Utpal Garain. Icfhr 2014 competition on recognition of on-line handwritten mathematical expressions (crohme

- 2014). In *2014 14th International Conference on Frontiers in Handwriting Recognition*, pages 791–796. IEEE, 2014. 2
- [13] Harold Mouchère, Christian Viard-Gaudin, Richard Zanibbi, and Utpal Garain. Icfhr2016 crohme: Competition on recognition of online handwritten mathematical expressions. In *2016 15th International Conference on Frontiers in Handwriting Recognition (ICFHR)*, pages 607–612. IEEE, 2016. 2
- [14] Junbo Niu, Zheng Liu, Zhuangcheng Gu, et al. Mineru2.5: A decoupled vision-language model for efficient high-resolution document parsing, 2025. 3
- [15] Linke Ouyang, Yuan Qu, Hongbin Zhou, Jiawei Zhu, Rui Zhang, Qunshu Lin, Bin Wang, Zhiyuan Zhao, Man Jiang, Xiaomeng Zhao, Jin Shi, Fan Wu, Pei Chu, Minghao Liu, Zhenxiang Li, Chao Xu, Bo Zhang, Botian Shi, Zhongying Tu, and Conghui He. Omnidocbench: Benchmarking diverse pdf document parsing with comprehensive annotations, 2024. 2
- [16] Vik Paruchuri. Texify: Turn images into latex. <https://github.com/VikParuchuri/texify>, 2022. Accessed: 2025-08-01. 3
- [17] Birgit Pfitzmann, Christoph Auer, Michele Dolfi, Ahmed S Nassar, and Peter W J Staar. Doclaynet: A large human-annotated dataset for document-layout analysis. 2022. 1
- [18] rednote hilab. dots.ocr, 2025. 3
- [19] Seed. Seed1.6, 2025. 3
- [20] Brian Smock. Fintabnet.c: Financial table recognition dataset. <https://huggingface.co/datasets/bsmock/FinTabNet.c>, 2024. Accessed: 2025-08-02. 2
- [21] Bin Wang, Zhuangcheng Gu, Guang Liang, Chao Xu, Bo Zhang, Botian Shi, and Conghui He. Unimernet: A universal network for real-world mathematical expression recognition. *arXiv preprint arXiv:2404.15254*, 2024. 2, 3
- [22] Bin Wang, Fan Wu, Linke Ouyang, Zhuangcheng Gu, Rui Zhang, Renqiu Xia, Bo Zhang, and Conghui He. Cdm: A reliable metric for fair and accurate formula recognition evaluation. *arXiv preprint arXiv:2409.03643*, 2024. 2
- [23] Bin Wang, Chao Xu, Xiaomeng Zhao, Linke Ouyang, Fan Wu, Zhiyuan Zhao, Rui Xu, Kaiwen Liu, Yuan Qu, Fukai Shang, Bo Zhang, Liqun Wei, Zhihao Sui, Wei Li, Botian Shi, Yu Qiao, Dahua Lin, and Conghui He. Mineru: An open-source solution for precise document content extraction, 2024. 3
- [24] Haoran Wei, Chenglong Liu, Jinyue Chen, Jia Wang, Lingyu Kong, Yanming Xu, Zheng Ge, Liang Zhao, Jianjian Sun, Yuang Peng, et al. General ocr theory: Towards ocr-2.0 via a unified end-to-end model. *arXiv preprint arXiv:2409.01704*, 2024. 2
- [25] Wenwen Yu, Zhibo Yang, Jianqiang Wan, Sibao Song, Jun Tang, Wenqing Cheng, Yuliang Liu, and Xiang Bai. Omniparser v2: Structured-points-of-thought for unified visual text parsing and its generality to multimodal large language models. *arXiv preprint arXiv:2502.16161*, 2025. 3
- [26] Ye Yuan, Xiao Liu, Wondimu Dikubab, Hui Liu, Zhilong Ji, Zhongqin Wu, and Xiang Bai. Syntax-aware network for handwritten mathematical expression recognition. *arXiv preprint arXiv:2203.01601*, 2022. 2
- [27] Zhiyuan Zhao, Hengrui Kang, Bin Wang, and Conghui He. Doclayout-yolo: Enhancing document layout analysis through diverse synthetic data and global-to-local adaptive perception, 2024. 1
- [28] Xinyi Zheng, Doug Burdick, Lucian Popa, Peter Zhong, and Nancy Xin Ru Wang. Global table extractor (gte): A framework for joint table identification and cell structure recognition using visual context. *Winter Conference for Applications in Computer Vision (WACV)*, 2021. 3
- [29] Xu Zhong, Elaheh ShafieiBavani, and Antonio Jimeno Yepes. Image-based table recognition: data, model, and evaluation. *arXiv preprint arXiv:1911.10683*, 2019. 3
- [30] Xingjian Zhong, Jialong Han, Chao Xu, and Caiming Xiong. Pubtabnet: Image-to-table generation using multi-modal learning. <https://github.com/ibm-aur-nlp/PubTabNet>, 2020. Accessed: 2025-08-02. 2
- [31] Xu Zhong, Elaheh ShafieiBavani, and Antonio Jimeno Yepes. Image-based table recognition: data, model, and evaluation. In *European conference on computer vision*, pages 564–580. Springer, 2020. 3

**Table 3**  
The constraints of MOP.

| Subject                                                                                      | Description                                                                                                                                                                                                                                                                                                                                                                                                   |
|----------------------------------------------------------------------------------------------|---------------------------------------------------------------------------------------------------------------------------------------------------------------------------------------------------------------------------------------------------------------------------------------------------------------------------------------------------------------------------------------------------------------|
| $w_1 \times x_1 + w_2 \times x_2 + w_3 \times x_3 + w_4 \times x_4 + w_5 \times x_5 = 100\%$ | The total area of all land types should remain unchanged.                                                                                                                                                                                                                                                                                                                                                     |
| $x_1 \geq 20.0\%$                                                                            | The area of cropland and woodland should be greater than or equal to 20% of the total area of the city.                                                                                                                                                                                                                                                                                                       |
| $0.04x_1 + x_2 \leq 0.04x_1 + 2.19x_3$                                                       | The forest cover share is calculated based on cropland, woodland, and grassland, with coefficients of 0.04, 1.00, and 0.20, respectively (Li, 1992; Wang, 2015). Ningxia's forest cover accounted for 26.0% of the total land area in 2021, and is expected to account for at least 30% by 2025. The upper and lower limits for cropland areas, the maximum and minimum areas during 2016–2020, respectively. |
| $0.5 \leq x_3 \leq 0.20$                                                                     | The upper limit of the grassland area in the maximum area during 2016–2020.                                                                                                                                                                                                                                                                                                                                   |
| $0.707 \leq x_4 \leq 0.1171.7$                                                               | The water area shows a decreasing trend from 2016 to 2020, so the lower limit is the area of 2020, which is predicted by Markov and the upper limit is 1171.7 km <sup>2</sup> , which is the maximum area during 2016–2020.                                                                                                                                                                                   |
| $2.04 \leq x_5 \leq 20.04$                                                                   | The area of built-up land in 2020 is the lower limit and the area of it in 2016 which is predicted by Markov is the upper limit.                                                                                                                                                                                                                                                                              |
| $0.5 \leq x_6 \leq 0.13$                                                                     | The upper limit of unused land is the current situation.                                                                                                                                                                                                                                                                                                                                                      |

**Table 4**  
Spatial area of the PLUS model, which is the area of each land type under BAU, RED, ELP, and EES, and its unit is km<sup>2</sup>.

| Land type     | BAU            | RED            | ELP            | EES            |
|---------------|----------------|----------------|----------------|----------------|
| Cropland      | 1960.2 (20.9%) | 2284.6 (24.2%) | 1705.6 (18.2%) | 2479.6 (26.4%) |
| Woodland      | 4267.9 (46.1%) | 4063.0 (43.8%) | 4511.8 (48.1%) | 4216.6 (45.1%) |
| Grassland     | 72.0 (0.8%)    | 82.0 (0.9%)    | 22.0 (0.2%)    | 148.0 (1.6%)   |
| Water area    | 1247.7 (13.5%) | 798.2 (8.6%)   | 1171.7 (12.5%) | 1171.7 (12.5%) |
| Built-up land | 2329.2 (25.2%) | 2329.2 (25.2%) | 2329.2 (25.2%) | 2329.2 (25.2%) |
| Unused land   | 11.8 (0.1%)    | 80.0 (0.9%)    | 80.0 (0.9%)    | 80.0 (0.9%)    |
| Total land    | 6267           | 6267           | 6267           | 6267           |

be converted to other land-use types. Second, under ELP and EES scenarios, the spatial conversions of grassland and woodland are prevented.

**2.3.3. Ecological risk assessment**

The assessment index system of ecological risk consists of nine indicators reflecting urban expansion pressure, landscape ecological risk, grain reserve pressure, and ecological degradation pressure. The weight of each indicator is calculated by the entropy method and AHP. The indicators of urban expansion pressure and their weights are urban expansion intensity (0.033), the proportion of built-up land (0.049), and the land-use composite index (0.07). The indicators of landscape ecological risk and their weights are Shannon's diversity index (0.063) and disturbance index (0.088). The indicators of grain reserve pressure and their weights are the proportion of cropland (0.043) and the reduction rate of cropland (0.054). The indicators of ecological degradation pressure and their weights are ecological service value (0.263) and ecological capacity (0.317). Among them, the proportion of cropland, ecological service value, and ecological capacity are negative indicators. Finally, the ecological risk is calculated by linear weighting after normalizing the above indicators.

The entropy method is an objective weighting method, which determines the weight according to the variability of indicators. In information theory, entropy is used to measure uncertain information. The

greater the amount of information, the smaller the uncertainty and the smaller the entropy; the smaller the amount of information, the greater the uncertainty and the greater the entropy.

Urban expansion intensity, land-use composite index, Shannon's diversity index, disturbance index, ecological service value, and ecological capacity are expressed as follows:

$$EI = \frac{1}{n} \sum_{i=1}^n \frac{x_i}{x_i + 1} \quad (1)$$

Where EI refers to urban expansion intensity,  $x_i$  refers to the changing area of built-up land from  $t_0$  to  $t_1$ ,  $\Delta t$  refers to the time interval from  $t_0$  to  $t_1$ ,  $A$  refers to the initial area of the built-up land.

$$L = 100 \times \sum_{i=1}^n (A_i \times C_i) \quad (2)$$

Where L refers to the land-use composite index,  $A_i$  refers to the value of graded land use, with unused land equal to 1, woodland, grassland, water area equal to 2, cropland equal to 3, and built-up land equal to 4,  $C_i$  refers to the area ratio of the  $i$ th land-use type.

$$HDI = -\sum_{i=1}^n p_i \ln p_i \quad (3)$$

Where HDI refers to Shannon's diversity index,  $p_i$  refers to the area ratio of the  $i$ th land-use type.

$$LDI = 0.579 + 0.251 \times 0.339 \quad (4)$$

Where LDI refers to the disturbance index, PD refers to patch density, SI refers to splitting index, and DI refers to landscape division. The software Fragans 4.2 is used to calculate PD, SI, and DI.

$$ESV = \sum_{i=1}^n A_i \times VC_i \quad (5)$$

Where ESV refers to ecological service value,  $A_i$  refers to the area of  $i$ th land-use type,  $VC_i$  refers to the service value per pixel of the  $i$ th land-use type.

$$EC = \sum_{i=1}^n A_i \times r_i \quad (6)$$

Where EC refers to ecological capacity,  $r_i$  refers to the biological production area of  $i$ th land-use type,  $r$  refers to the equilibrium factor, and  $y_i$  refers to the production factor.

**3. Results**

**3.1. Predicted results of land use under four scenarios**

The PLUS model was employed to simulate the land-use types under different scenarios in these experiments. To verify the credibility of the PLUS model, we first predicted the spatial distribution of land use in 2020 based on the historical trend. Then the comparison was conducted between the predicted and real data for 2020. The overall accuracy of the predicted result is 0.74, which indicated that the PLUS model has a high degree of accuracy in land use simulation. To predict the land-use map in 2025 under BAU, RED, ELP, and EES scenarios, the pixel number of each land-use type in 2020 under four scenarios and land-use data in 2020 were input into the CARS module of the PLUS model. The Markov module of the PLUS model and MOP achieved by LINDO 18.0 software were adopted to predict the area of each land-use type under BAU and the other three scenarios, respectively. The predicted data of each land-use type under four scenarios are shown in Table 4. The RED scenario presents the highest area of cropland and the least water area. Compared to BAU and RED scenarios, the area of woodland is significantly higher under ELP and EES scenarios. The area of built-up land is significantly higher under RED and EES scenarios.

Influenced by the growth probability processed by LEAS, the predicted area of each land-use type of Nanjing under four scenarios in 2025 could only approximate the ideal area in Table 4. As shown in

**Table 5**  
The constraints of MOP.

| Subject                                                       | Description                                                                                                                                                                                                                                                                                     |
|---------------------------------------------------------------|-------------------------------------------------------------------------------------------------------------------------------------------------------------------------------------------------------------------------------------------------------------------------------------------------|
| $x_1 + x_2 + x_3 + x_4 + x_5 + x_6 + x_7 + x_8 + x_9 = 100\%$ | the total area of all land types should remain unchanged                                                                                                                                                                                                                                        |
| $x_1 \geq 20.0\%$                                             | the total area of cropland and built-up land should be greater than or equal to 20% of the total area of the city                                                                                                                                                                               |
| $0.04x_1 + x_2 \leq 0.04x_1 + 2.19x_3$                        | the forest cover share is calculated based on cropland, woodland, and grassland, with coefficients of 0.04, 1.00, and 0.20, respectively (Li, 1992; Wang, 2015). Ningxia's forest cover accounted for 26.0% of the total land area in 2021 and is expected to account for at least 30% by 2025. |
| $0.5 \leq x_3 \leq 0.20$                                      | the upper and lower limits for cropland areas are the maximum and minimum areas during 2016–2020, respectively.                                                                                                                                                                                 |
| $0.707 \leq x_4 \leq 0.1171.7$                                | the upper limit of the grassland area is the maximum area during 2016–2020.                                                                                                                                                                                                                     |
| $2.04 \leq x_5 \leq 20.04$                                    | the water area shows a decreasing trend from 2016 to 2020, so the lower limit is the area of 2020, which is predicted by Markov and the upper limit is 1171.7 km <sup>2</sup> , which is the maximum area during 2016–2020.                                                                     |
| $0.5 \leq x_6 \leq 0.13$                                      | the upper limit of unused land is the current situation.                                                                                                                                                                                                                                        |

**Table 4**  
Spatial area of the PLUS model, which is the area of each land type under BAU, RED, ELP, and EES, and its unit is km<sup>2</sup>.

| Land type     | BAU            | RED            | ELP            | EES            |
|---------------|----------------|----------------|----------------|----------------|
| Cropland      | 1960.2 (20.9%) | 2284.6 (24.2%) | 1705.6 (18.2%) | 2479.6 (26.4%) |
| Woodland      | 4267.9 (46.1%) | 4063.0 (43.8%) | 4511.8 (48.1%) | 4216.6 (45.1%) |
| Grassland     | 72.0 (0.8%)    | 82.0 (0.9%)    | 22.0 (0.2%)    | 148.0 (1.6%)   |
| Water area    | 1247.7 (13.5%) | 798.2 (8.6%)   | 1171.7 (12.5%) | 1171.7 (12.5%) |
| Built-up land | 2329.2 (25.2%) | 2329.2 (25.2%) | 2329.2 (25.2%) | 2329.2 (25.2%) |
| Unused land   | 11.8 (0.1%)    | 80.0 (0.9%)    | 80.0 (0.9%)    | 80.0 (0.9%)    |
| Total land    | 6267           | 6267           | 6267           | 6267           |

be converted to other land-use types. Second, under ELP and EES scenarios, the spatial conversions of grassland and woodland are prevented.

**2.3.3. Ecological risk assessment**

The assessment index system of ecological risk consists of nine indicators reflecting urban expansion pressure, landscape ecological risk, grain reserve pressure, and ecological degradation pressure. The weight of each indicator is calculated by the entropy method and AHP. The indicators of urban expansion pressure and their weights are urban expansion intensity (0.033), the proportion of built-up land (0.049), and the land-use composite index (0.07). The indicators of landscape ecological risk and their weights are Shannon's diversity index (0.063) and disturbance index (0.088). The indicators of grain reserve pressure and their weights are the proportion of cropland (0.043) and the reduction rate of cropland (0.054). The indicators of ecological degradation pressure and their weights are ecological service value (0.263) and ecological capacity (0.317). Among them, the proportion of cropland, ecological service value, and ecological capacity are negative indicators. Finally, the ecological risk is calculated by linear weighting after normalizing the above indicators.

The entropy method is an objective weighting method, which determines the weight according to the variability of indicators. In information theory, entropy is used to measure uncertain information. The greater the amount of information, the smaller the uncertainty and the smaller the entropy; the smaller the amount of information, the greater the uncertainty and the greater the entropy.

Urban expansion intensity, land-use composite index, Shannon's diversity index, disturbance index, ecological service value, and ecological capacity are expressed as follows:

$$EI = \frac{1}{n} \sum_{i=1}^n \frac{x_i}{x_i + 1} \quad (1)$$

Where EI refers to urban expansion intensity,  $x_i$  refers to the changing area of built-up land from  $t_0$  to  $t_1$ ,  $\Delta t$  refers to the time interval from  $t_0$  to  $t_1$ ,  $A$  refers to the initial area of the built-up land.

$$L = 100 \times \sum_{i=1}^n (A_i \times C_i) \quad (2)$$

Where L refers to the land-use composite index,  $A_i$  refers to the value of graded land use, with unused land equal to 1, woodland, grassland, water area equal to 2, cropland equal to 3, and built-up land equal to 4,  $C_i$  refers to the area ratio of the  $i$ th land-use type.

$$HDI = -\sum_{i=1}^n p_i \ln p_i \quad (3)$$

Where HDI refers to Shannon's diversity index,  $p_i$  refers to the area ratio of the  $i$ th land-use type.

$$LDI = 0.579 + 0.251 \times 0.339 \quad (4)$$

Where LDI refers to the disturbance index, PD refers to patch density, SI refers to splitting index, and DI refers to landscape division. The software Fragans 4.2 is used to calculate PD, SI, and DI.

$$ESV = \sum_{i=1}^n A_i \times VC_i \quad (5)$$

Where ESV refers to ecological service value,  $A_i$  refers to the area of  $i$ th land-use type,  $VC_i$  refers to the service value per pixel of the  $i$ th land-use type.

$$EC = \sum_{i=1}^n A_i \times r_i \quad (6)$$

Where EC refers to ecological capacity,  $r_i$  refers to the biological production area of  $i$ th land-use type,  $r$  refers to the equilibrium factor, and  $y_i$  refers to the production factor.

**3. Predicted results of land use under four scenarios**

The PLUS model was employed to simulate the land-use types under different scenarios in these experiments. To verify the credibility of the PLUS model, we first predicted the spatial distribution of land use in 2020 based on the historical trend. Then the comparison was conducted between the predicted and real data for 2020. The overall accuracy of the predicted result is 0.74, which indicated that the PLUS model has a high degree of accuracy in land use simulation. To predict the land-use map in 2025 under BAU, RED, ELP, and EES scenarios, the pixel number of each land-use type in 2020 under four scenarios and land-use data in 2020 were input into the CARS module of the PLUS model. The Markov module of the PLUS model and MOP achieved by LINDO 18.0 software were adopted to predict the area of each land-use type under BAU and the other three scenarios, respectively. The predicted data of each land-use type under four scenarios are shown in Table 4. The RED scenario presents the highest area of cropland and the least water area. Compared to BAU and RED scenarios, the area of woodland is significantly higher under ELP and EES scenarios. The area of built-up land is significantly higher under RED and EES scenarios.

Influenced by the growth probability processed by LEAS, the predicted area of each land-use type of Nanjing under four scenarios in 2025 could only approximate the ideal area in Table 4. As shown in

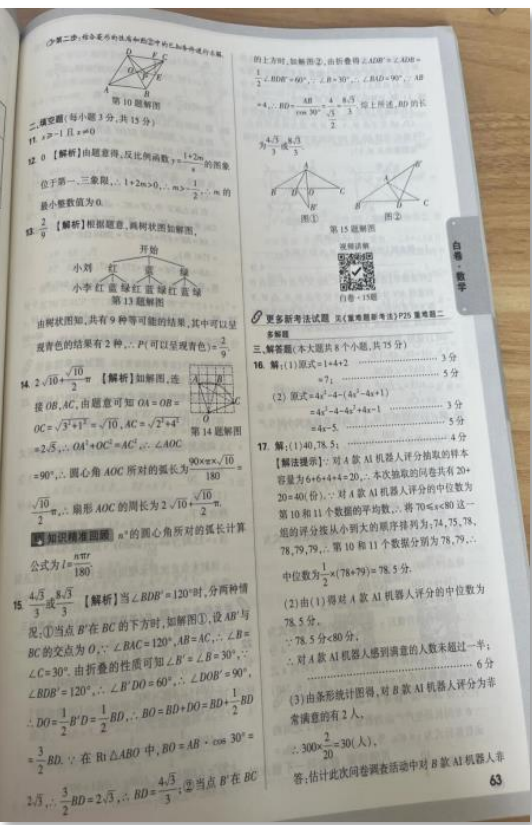

第二步:结合菱形的性质和图2中的已知条件进行求解.

<Fig>第10题解图</Fig> $\langle \text{Fig} \rangle = \langle \text{quad} \rangle \langle 204, 50 \rangle, \langle 325, 111 \rangle \langle \text{quad} \rangle$

## 二. 填空题(每小题3分,共15分)

11.  $x \geq 0, y \geq 1, z \geq 0$

12. 0 【解析】由题意得反比例函数  $y = \frac{1}{2+2m}x$  的图象位于第一、三象限,  $\therefore 2+2m > 0, \therefore m > -1, \therefore m$  的最小整数值为 0.

13.  $\frac{1}{2} \langle \text{frac} \rangle \langle 2 \rangle \langle 9 \rangle$  【解析】根据题意, 画树状图如解图.

<Fig>第13题解图</Fig> $\langle \text{Fig} \rangle = \langle \text{quad} \rangle \langle 145, 291 \rangle, \langle 368, 357 \rangle \langle \text{quad} \rangle$

由树状图可知共有9种等可能的结果, 其中可以出现青色的结果有2种,  $\therefore$  出现青色结果的概率  $P(\text{青色}) = \frac{2}{9}$ .

14.  $2\sqrt{10} + \frac{10}{3}$  【解析】如解图, 连接OB, AC. 由题意可知  $OA = OB = OC = \sqrt{3}$ ,  $\angle AOC = 120^\circ$ ,  $\angle AOB = \angle BOC = 120^\circ$ .  $\therefore \triangle AOB \cong \triangle BOC$ .  $\therefore \angle ABO = \angle CBO = 30^\circ$ .  $\therefore \angle ABC = 60^\circ$ .  $\therefore \triangle ABC$  是等边三角形.  $\therefore AB = BC = AC = \sqrt{3}$ .  $\therefore \triangle AOB$  和  $\triangle BOC$  都是顶角为  $120^\circ$  的等腰三角形.  $\therefore$  由余弦定理得  $AB^2 = OA^2 + OB^2 - 2 \cdot OA \cdot OB \cdot \cos 120^\circ = 3 + 3 - 2 \cdot \sqrt{3} \cdot \sqrt{3} \cdot (-\frac{1}{2}) = 6 + 3 = 9$ .  $\therefore AB = 3$ .  $\therefore \triangle ABC$  的周长为  $3 + 3 + 3 = 9$ .

<Fig>第14题解图</Fig> $\langle \text{Fig} \rangle = \langle \text{quad} \rangle \langle 362, 436 \rangle, \langle 461, 510 \rangle \langle \text{quad} \rangle$

知识精准回顾:  $n^\circ$  的圆心角所对的弧长计算公式为  $l = \frac{n\pi r}{180}$ .

15.  $\frac{1}{2} \langle \text{frac} \rangle \langle 4\sqrt{3} \rangle \langle 3 \rangle \langle 3 \rangle$  或  $\frac{1}{2} \langle \text{frac} \rangle \langle 8\sqrt{3} \rangle \langle 3 \rangle \langle 3 \rangle$  【解析】当  $\angle BDB' = 120^\circ$  时, 分两种情况: ① 当点  $B'$  在  $BC$  的下方时, 如解图1, 设  $AB'$  与  $BC$  的交点为  $O$ .  $\because \angle BDB' = 120^\circ$ ,  $\angle BDB' = \angle BDB' + \angle BDB' = 120^\circ$ ,  $\therefore \angle BDB' = 60^\circ$ .  $\therefore \triangle BDB'$  是等边三角形.  $\therefore BD = B'D = 3$ .  $\therefore \triangle BDB'$  是等边三角形.  $\therefore \angle BDB' = 120^\circ$ ,  $\therefore \angle BDB' = 60^\circ$ .  $\therefore \angle BDB' = 90^\circ$ .  $\therefore \triangle BDB'$  是直角三角形.  $\therefore BD = 3$ ,  $B'D = 3$ .  $\therefore \triangle BDB'$  是等腰直角三角形.  $\therefore \angle BDB' = 120^\circ$ ,  $\therefore \angle BDB' = 60^\circ$ .  $\therefore \angle BDB' = 90^\circ$ .  $\therefore \triangle BDB'$  是直角三角形.  $\therefore BD = 3$ ,  $B'D = 3$ .  $\therefore \triangle BDB'$  是等腰直角三角形.  $\therefore \angle BDB' = 120^\circ$ ,  $\therefore \angle BDB' = 60^\circ$ .  $\therefore \angle BDB' = 90^\circ$ .  $\therefore \triangle BDB'$  是直角三角形.  $\therefore BD = 3$ ,  $B'D = 3$ .  $\therefore \triangle BDB'$  是等腰直角三角形.  $\therefore \angle BDB' = 120^\circ$ ,  $\therefore \angle BDB' = 60^\circ$ .  $\therefore \angle BDB' = 90^\circ$ .  $\therefore \triangle BDB'$  是直角三角形.  $\therefore BD = 3$ ,  $B'D = 3$ .  $\therefore \triangle BDB'$  是等腰直角三角形.  $\therefore \angle BDB' = 120^\circ$ ,  $\therefore \angle BDB' = 60^\circ$ .  $\therefore \angle BDB' = 90^\circ$ .  $\therefore \triangle BDB'$  是直角三角形.  $\therefore BD = 3$ ,  $B'D = 3$ .  $\therefore \triangle BDB'$  是等腰直角三角形.  $\therefore \angle BDB' = 120^\circ$ ,  $\therefore \angle BDB' = 60^\circ$ .  $\therefore \angle BDB' = 90^\circ$ .  $\therefore \triangle BDB'$  是直角三角形.  $\therefore BD = 3$ ,  $B'D = 3$ .  $\therefore \triangle BDB'$  是等腰直角三角形.  $\therefore \angle BDB' = 120^\circ$ ,  $\therefore \angle BDB' = 60^\circ$ .  $\therefore \angle BDB' = 90^\circ$ .  $\therefore \triangle BDB'$  是直角三角形.  $\therefore BD = 3$ ,  $B'D = 3$ .  $\therefore \triangle BDB'$  是等腰直角三角形.  $\therefore \angle BDB' = 120^\circ$ ,  $\therefore \angle BDB' = 60^\circ$ .  $\therefore \angle BDB' = 90^\circ$ .  $\therefore \triangle BDB'$  是直角三角形.  $\therefore BD = 3$ ,  $B'D = 3$ .  $\therefore \triangle BDB'$  是等腰直角三角形.  $\therefore \angle BDB' = 120^\circ$ ,  $\therefore \angle BDB' = 60^\circ$ .  $\therefore \angle BDB' = 90^\circ$ .  $\therefore \triangle BDB'$  是直角三角形.  $\therefore BD = 3$ ,  $B'D = 3$ .  $\therefore \triangle BDB'$  是等腰直角三角形.  $\therefore \angle BDB' = 120^\circ$ ,  $\therefore \angle BDB' = 60^\circ$ .  $\therefore \angle BDB' = 90^\circ$ .  $\therefore \triangle BDB'$  是直角三角形.  $\therefore BD = 3$ ,  $B'D = 3$ .  $\therefore \triangle BDB'$  是等腰直角三角形.  $\therefore \angle BDB' = 120^\circ$ ,  $\therefore \angle BDB' = 60^\circ$ .  $\therefore \angle BDB' = 90^\circ$ .  $\therefore \triangle BDB'$  是直角三角形.  $\therefore BD = 3$ ,  $B'D = 3$ .  $\therefore \triangle BDB'$  是等腰直角三角形.  $\therefore \angle BDB' = 120^\circ$ ,  $\therefore \angle BDB' = 60^\circ$ .  $\therefore \angle BDB' = 90^\circ$ .  $\therefore \triangle BDB'$  是直角三角形.  $\therefore BD = 3$ ,  $B'D = 3$ .  $\therefore \triangle BDB'$  是等腰直角三角形.  $\therefore \angle BDB' = 120^\circ$ ,  $\therefore \angle BDB' = 60^\circ$ .  $\therefore \angle BDB' = 90^\circ$ .  $\therefore \triangle BDB'$  是直角三角形.  $\therefore BD = 3$ ,  $B'D = 3$ .  $\therefore \triangle BDB'$  是等腰直角三角形.  $\therefore \angle BDB' = 120^\circ$ ,  $\therefore \angle BDB' = 60^\circ$ .  $\therefore \angle BDB' = 90^\circ$ .  $\therefore \triangle BDB'$  是直角三角形.  $\therefore BD = 3$ ,  $B'D = 3$ .  $\therefore \triangle BDB'$  是等腰直角三角形.  $\therefore \angle BDB' = 120^\circ$ ,  $\therefore \angle BDB' = 60^\circ$ .  $\therefore \angle BDB' = 90^\circ$ .  $\therefore \triangle BDB'$  是直角三角形.  $\therefore BD = 3$ ,  $B'D = 3$ .  $\therefore \triangle BDB'$  是等腰直角三角形.  $\therefore \angle BDB' = 120^\circ$ ,  $\therefore \angle BDB' = 60^\circ$ .  $\therefore \angle BDB' = 90^\circ$ .  $\therefore \triangle BDB'$  是直角三角形.  $\therefore BD = 3$ ,  $B'D = 3$ .  $\therefore \triangle BDB'$  是等腰直角三角形.  $\therefore \angle BDB' = 120^\circ$ ,  $\therefore \angle BDB' = 60^\circ$ .  $\therefore \angle BDB' = 90^\circ$ .  $\therefore \triangle BDB'$  是直角三角形.  $\therefore BD = 3$ ,  $B'D = 3$ .  $\therefore \triangle BDB'$  是等腰直角三角形.  $\therefore \angle BDB' = 120^\circ$ ,  $\therefore \angle BDB' = 60^\circ$ .  $\therefore \angle BDB' = 90^\circ$ .  $\therefore \triangle BDB'$  是直角三角形.  $\therefore BD = 3$ ,  $B'D = 3$ .  $\therefore \triangle BDB'$  是等腰直角三角形.  $\therefore \angle BDB' = 120^\circ$ ,  $\therefore \angle BDB' = 60^\circ$ .  $\therefore \angle BDB' = 90^\circ$ .  $\therefore \triangle BDB'$  是直角三角形.  $\therefore BD = 3$ ,  $B'D = 3$ .  $\therefore \triangle BDB'$  是等腰直角三角形.  $\therefore \angle BDB' = 120^\circ$ ,  $\therefore \angle BDB' = 60^\circ$ .  $\therefore \angle BDB' = 90^\circ$ .  $\therefore \triangle BDB'$  是直角三角形.  $\therefore BD = 3$ ,  $B'D = 3$ .  $\therefore \triangle BDB'$  是等腰直角三角形.  $\therefore \angle BDB' = 120^\circ$ ,  $\therefore \angle BDB' = 60^\circ$ .  $\therefore \angle BDB' = 90^\circ$ .  $\therefore \triangle BDB'$  是直角三角形.  $\therefore BD = 3$ ,  $B'D = 3$ .  $\therefore \triangle BDB'$  是等腰直角三角形.  $\therefore \angle BDB' = 120^\circ$ ,  $\therefore \angle BDB' = 60^\circ$ .  $\therefore \angle BDB' = 90^\circ$ .  $\therefore \triangle BDB'$  是直角三角形.  $\therefore BD = 3$ ,  $B'D = 3$ .  $\therefore \triangle BDB'$  是等腰直角三角形.  $\therefore \angle BDB' = 120^\circ$ ,  $\therefore \angle BDB' = 60^\circ$ .  $\therefore \angle BDB' = 90^\circ$ .  $\therefore \triangle BDB'$  是直角三角形.  $\therefore BD = 3$ ,  $B'D = 3$ .  $\therefore \triangle BDB'$  是等腰直角三角形.  $\therefore \angle BDB' = 120^\circ$ ,  $\therefore \angle BDB' = 60^\circ$ .  $\therefore \angle BDB' = 90^\circ$ .  $\therefore \triangle BDB'$  是直角三角形.  $\therefore BD = 3$ ,  $B'D = 3$ .  $\therefore \triangle BDB'$  是等腰直角三角形.  $\therefore \angle BDB' = 120^\circ$ ,  $\therefore \angle BDB' = 60^\circ$ .  $\therefore \angle BDB' = 90^\circ$ .  $\therefore \triangle BDB'$  是直角三角形.  $\therefore BD = 3$ ,  $B'D = 3$ .  $\therefore \triangle BDB'$  是等腰直角三角形.  $\therefore \angle BDB' = 120^\circ$ ,  $\therefore \angle BDB' = 60^\circ$ .  $\therefore \angle BDB' = 90^\circ$ .  $\therefore \triangle BDB'$  是直角三角形.  $\therefore BD = 3$ ,  $B'D = 3$ .  $\therefore \triangle BDB'$  是等腰直角三角形.  $\therefore \angle BDB' = 120^\circ$ ,  $\therefore \angle BDB' = 60^\circ$ .  $\therefore \angle BDB' = 90^\circ$ .  $\therefore \triangle BDB'$  是直角三角形.  $\therefore BD = 3$ ,  $B'D = 3$ .  $\therefore \triangle BDB'$  是等腰直角三角形.  $\therefore \angle BDB' = 120^\circ$ ,  $\therefore \angle BDB' = 60^\circ$ .  $\therefore \angle BDB' = 90^\circ$ .  $\therefore \triangle BDB'$  是直角三角形.  $\therefore BD = 3$ ,  $B'D = 3$ .  $\therefore \triangle BDB'$  是等腰直角三角形.  $\therefore \angle BDB' = 120^\circ$ ,  $\therefore \angle BDB' = 60^\circ$ .  $\therefore \angle BDB' = 90^\circ$ .  $\therefore \triangle BDB'$  是直角三角形.  $\therefore BD = 3$ ,  $B'D = 3$ .  $\therefore \triangle BDB'$  是等腰直角三角形.  $\therefore \angle BDB' = 120^\circ$ ,  $\therefore \angle BDB' = 60^\circ$ .  $\therefore \angle BDB' = 90^\circ$ .  $\therefore \triangle BDB'$  是直角三角形.  $\therefore BD = 3$ ,  $B'D = 3$ .  $\therefore \triangle BDB'$  是等腰直角三角形.  $\therefore \angle BDB' = 120^\circ$ ,  $\therefore \angle BDB' = 60^\circ$ .  $\therefore \angle BDB' = 90^\circ$ .  $\therefore \triangle BDB'$  是直角三角形.  $\therefore BD = 3$ ,  $B'D = 3$ .  $\therefore \triangle BDB'$  是等腰直角三角形.  $\therefore \angle BDB' = 120^\circ$ ,  $\therefore \angle BDB' = 60^\circ$ .  $\therefore \angle BDB' = 90^\circ$ .  $\therefore \triangle BDB'$  是直角三角形.  $\therefore BD = 3$ ,  $B'D = 3$ .  $\therefore \triangle BDB'$  是等腰直角三角形.  $\therefore \angle BDB' = 120^\circ$ ,  $\therefore \angle BDB' = 60^\circ$ .  $\therefore \angle BDB' = 90^\circ$ .  $\therefore \triangle BDB'$  是直角三角形.  $\therefore BD = 3$ ,  $B'D = 3$ .  $\therefore \triangle BDB'$  是等腰直角三角形.  $\therefore \angle BDB' = 120^\circ$ ,  $\therefore \angle BDB' = 60^\circ$ .  $\therefore \angle BDB' = 90^\circ$ .  $\therefore \triangle BDB'$  是直角三角形.  $\$

高一2407班下学期课表 (2025年2月17日执行)

| 时间          | 节次      | 星期一    | 星期二 | 星期三  | 星期四 | 星期五 | 星期六 | 星期日      |
|-------------|---------|--------|-----|------|-----|-----|-----|----------|
| 7:00        |         | 到校     |     |      |     |     |     |          |
| 07:00-07:20 | 晨读      |        | 英语  | 语文   | 英语  | 语文  | 语文  | 07:50 到校 |
| 07:20-07:50 | 早自习     | 英语/升旗  | 语文  | 英语   | 语文  | 英语  | 英语  |          |
| 08:00-08:40 | 1       | 语文     | 英语  | 数学   | 英语  | 语文  | 英语  | 辅<br>优   |
| 08:50-09:30 | 2       | 英语     | 数学  | 数学   | 英语  | 英语  | 英语  |          |
| 09:30-10:00 | 大课间活动   |        |     |      |     |     |     |          |
| 10:00-10:40 | 3       | 物理     | 物理  | 数学   | 数学  | 数学  | 自习  |          |
| 10:40-10:50 | 课保健康    |        |     |      |     |     |     |          |
| 10:50-11:30 | 4       | 历史     | 语文  | 英语   | 语文  | 生物  | 语文  |          |
| 11:40-12:20 | 5       | 数学     | 语文  | 阅读   | 物理  | 物理  | 语文  |          |
| 12:20-13:05 | 午餐+打扫卫生 |        |     |      |     |     |     |          |
| 13:05-13:20 | 中/英文辅导  |        |     |      |     |     |     |          |
| 13:20-14:00 | 午休      |        |     |      |     |     |     |          |
| 14:10-14:50 | 6       | 生物     | 自习  | 化学   | 地理  | 体育  | 生物  | 化学       |
| 15:00-15:40 | 7       | 信息     | 生物  | 地理   | 美术  | 音乐  | 生物  | 化学       |
| 15:50-16:30 | 8       | 化学     | 化学  | 体育   | 历史  | 化学  | 数学  | 物理       |
| 16:40-17:20 | 9       | 心理/校本双 | 听力  | 生物   | 劳动  | 听力  | 数学  | 物理       |
| 17:20-17:50 | 晚餐      |        |     |      |     |     |     | 晚餐       |
| 17:50-18:10 | 活动+打扫卫生 |        |     |      |     |     |     | 活动       |
| 18:10-18:50 | 晚读前     |        |     |      |     |     |     | 晚读       |
| 19:00-19:45 | 晚一      | 生物     | 物理  | 生物   | 物理  | 数学  | 数学  | 班会       |
| 19:45-19:50 | 课保健康    |        |     |      |     |     |     | 课保健康     |
| 20:00-20:45 | 晚二      | 数学     | 化学  | 数学   | 化学  | 化学  | 化学  | 自习       |
| 20:55-21:40 | 晚三      | 数学自习   |     | 数学自习 |     |     |     |          |
| 21:40-21:45 | 熄灯      |        |     |      |     |     |     |          |
| 22:30       | 熄灯睡觉    |        |     |      |     |     |     |          |

高一2407班下学期课表 (2025年2月17日执行)

| 时间          | 节次      | 星期一    | 星期二 | 星期三  | 星期四 | 星期五 | 星期六 | 星期日      |
|-------------|---------|--------|-----|------|-----|-----|-----|----------|
| 7:00        | 到校      |        |     |      |     |     |     |          |
| 07:00-07:20 | 晨读      |        | 英语  | 语文   | 英语  | 语文  | 语文  | 07:50 到校 |
| 07:20-07:50 | 早自习     | 英语/升旗  | 语文  | 英语   | 语文  | 英语  | 英语  |          |
| 08:00-08:40 | 1       | 语文     | 英语  | 数学   | 英语  | 语文  | 英语  |          |
| 08:50-09:30 | 2       | 英语     | 数学  | 数学   | 英语  | 英语  | 英语  |          |
| 09:30-10:00 | 大课间活动   |        |     |      |     |     |     |          |
| 10:00-10:40 | 3       | 物理     | 物理  | 语文   | 数学  | 数学  | 自习  | 辅优       |
| 10:40-10:50 | 课保健康    |        |     |      |     |     |     |          |
| 10:50-11:30 | 4       | 历史     | 语文  | 英语   | 语文  | 生物  | 语文  |          |
| 11:40-12:20 | 5       | 数学     | 语文  | 阅读   | 物理  | 物理  | 语文  |          |
| 12:20-13:05 | 午餐+打扫卫生 |        |     |      |     |     |     |          |
| 13:05-13:20 | 中/英文辅导  |        |     |      |     |     |     |          |
| 13:20-14:00 | 午休      |        |     |      |     |     |     |          |
| 14:10-14:50 | 6       | 生物     | 自习  | 化学   | 地理  | 体育  | 生物  | 化学       |
| 15:00-15:40 | 7       | 信息     | 生物  | 地理   | 美术  | 音乐  | 生物  | 化学       |
| 15:50-16:30 | 8       | 化学     | 化学  | 体育   | 历史  | 化学  | 数学  | 物理       |
| 16:40-17:20 | 9       | 心理/校本双 | 听力  | 生物   | 劳动  | 听力  | 数学  | 物理       |
| 17:20-17:50 | 晚餐      |        |     |      |     |     |     |          |
| 17:50-18:10 | 活动+打扫卫生 |        |     |      |     |     |     |          |
| 18:10-18:50 | 晚读前     |        |     |      |     |     |     |          |
| 19:00-19:45 | 晚一      | 生物     | 物理  | 生物   | 物理  | 数学  | 数学  | 班会       |
| 19:45-19:50 | 课保健康    |        |     |      |     |     |     |          |
| 20:00-20:45 | 晚二      | 数学     | 化学  | 数学   | 化学  | 化学  | 化学  | 自习       |
| 20:55-21:40 | 晚三      | 数学自习   |     | 数学自习 |     |     |     |          |
| 21:40-21:45 | 熄灯      |        |     |      |     |     |     |          |
| 22:30       | 熄灯睡觉    |        |     |      |     |     |     |          |

分体落地式空调器

|             |                            |
|-------------|----------------------------|
| 整机型号        | KFR-51LW/DY-JN(E3)         |
| 室内机型号       | KFR-51LDY-JN(E3)           |
| 室外机型号       | KFR-51W-M242               |
| 制冷量         | 5100W                      |
| 制热量         | 5800W+1800W(电加热管)          |
| EER/COP     | 3.09/3.37                  |
| 循环风量        | 1000m³/h                   |
| 制冷剂         | (见室外机铭牌)                   |
| 防水等级(室外机)   | IPX4                       |
| 防触电保护类型     | I类                         |
| 质量(室内机/室外机) | 39kg/115kg(含铜)             |
| 噪声          | 室内侧:54dB(A)<br>室外侧:54dB(A) |
| 制冷系统允许压力    | 2.6MPa                     |
| 热交换器最大工作压力  | 2.6MPa                     |
| 额定电压/额定频率   | 220V~/50Hz                 |
| 额定          | 制冷 7.8A                    |
| 电流          | 制热 8.0A+8.2A               |
| 额定工         | 制冷 1650W                   |
| 功率          | 制热 1720W+1800W             |
| 最大输入        | 21.4A                      |
| 电流          | 4000W                      |
| 电辅助加热       | 8.2A                       |
| 输入电流        | 1800W                      |

CCC

室内机出厂编号 (见机身条形码)  
室内机制造日期  
广东美的制冷设备有限公司  
生产日期 2009年08月  
机身编号: 6LUK4098118033325

分体落地式空调器

|             |                                            |
|-------------|--------------------------------------------|
| 整机型号        | KFR-51LW/DY-JN(E3)                         |
| 室内机型号       | KFR-51LDY-JN(E3)                           |
| 室外机型号       | KFR-51W-M242                               |
| 制冷量         | 5100W                                      |
| 制热量         | 5800W+1800W(电加热管)                          |
| EER/COP     | 3.09/3.37                                  |
| 循环风量        | 1000m³/h                                   |
| 制冷剂         | (见室外机铭牌)                                   |
| 防水等级(室外机)   | IPX4                                       |
| 防触电保护类型     | I类                                         |
| 质量(室内机/室外机) | 39kg(见室外机铭牌)                               |
| 噪声          | 室内侧:低风-中风-超强风 38-41-44dB(A)<br>室外侧 54dB(A) |
| 制冷系统允许压力    | 2.6MPa                                     |
| 热交换器最大工作压力  | 2.6MPa                                     |
| 额定电压/额定频率   | 220V~/50Hz                                 |
| 额定          | 制冷 7.8A                                    |
| 电流          | 制热 8.0A+8.2A                               |
| 标准工         | 制冷 1650W                                   |
| 况           | 制热 1720W+1800W                             |
| 最大输入        | 21.4A                                      |
| 电流          | 4000W                                      |
| 电辅助加热       | 8.2A                                       |
| 输入电流        | 1800W                                      |

室内机出厂编号  
室内机制造日期  
广东美的制冷设备有限公司  
生产日期 2009年08月  
机身编号: 6LUK4098118033325

Figure 3. Representative parsing results (II).

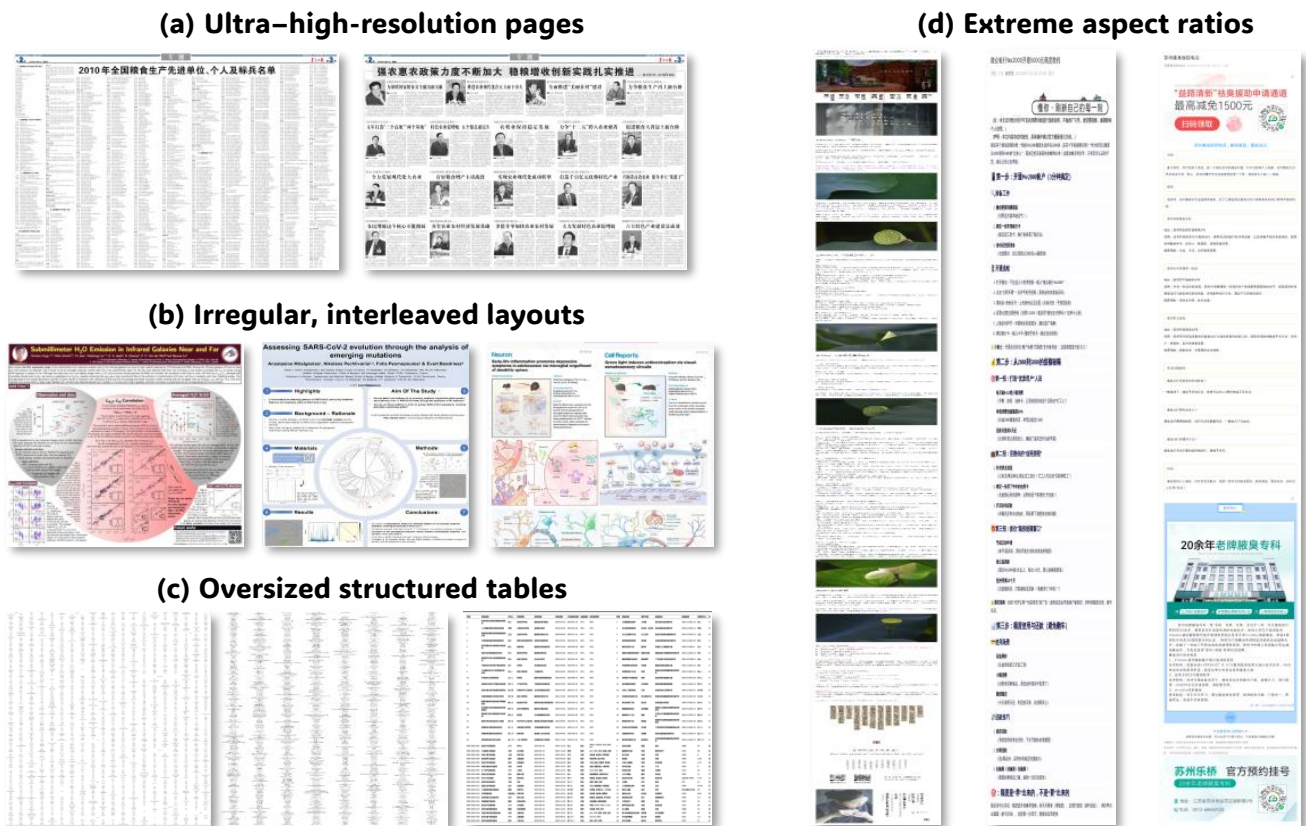

Figure 4. **Error Case Taxonomy and Examples.** Web-sourced documents where *DocHumming* reaches the 8,192-token cap and exhibits repetition: (a) ultra-high-resolution pages, (b) irregular/interleaved layouts, (c) oversized structured tables, and (d) extreme aspect ratios.
